# Supplementary material
Source: Springer Nature journal article supplement (https://www.springermedizin.de/resource/supplementary/13223_2012_372_MOESM4_ESM.pdf/9597822)

**A**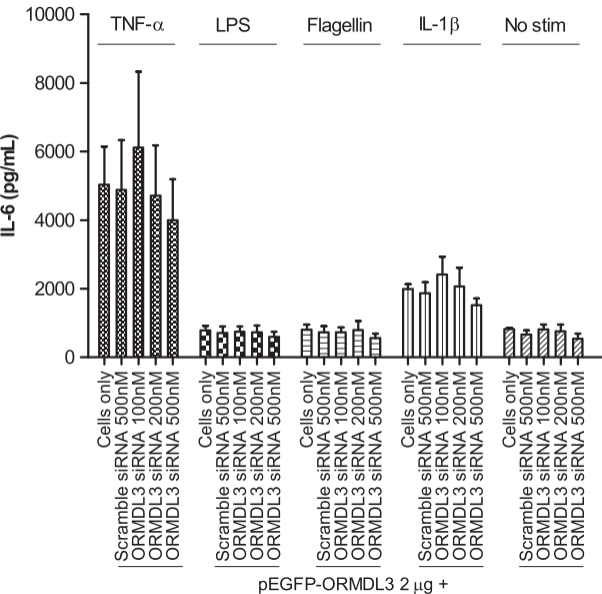**B**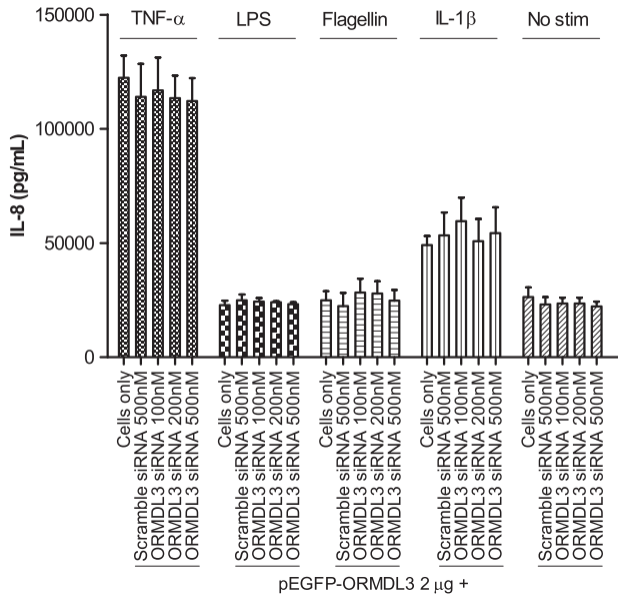

Supplement: MOESM4 [file 9597822]
